# Supplementary material for: Evidence of IL-17, IP-10, and IL-10 involvement in multiple-organ dysfunction and IL-17 pathway in acute renal failure associated to Plasmodium falciparum malaria
Source: PubMed Central journal article supplement (PMC4658812; doi:10.1186/s12967-015-0731-6), 2015-11-24

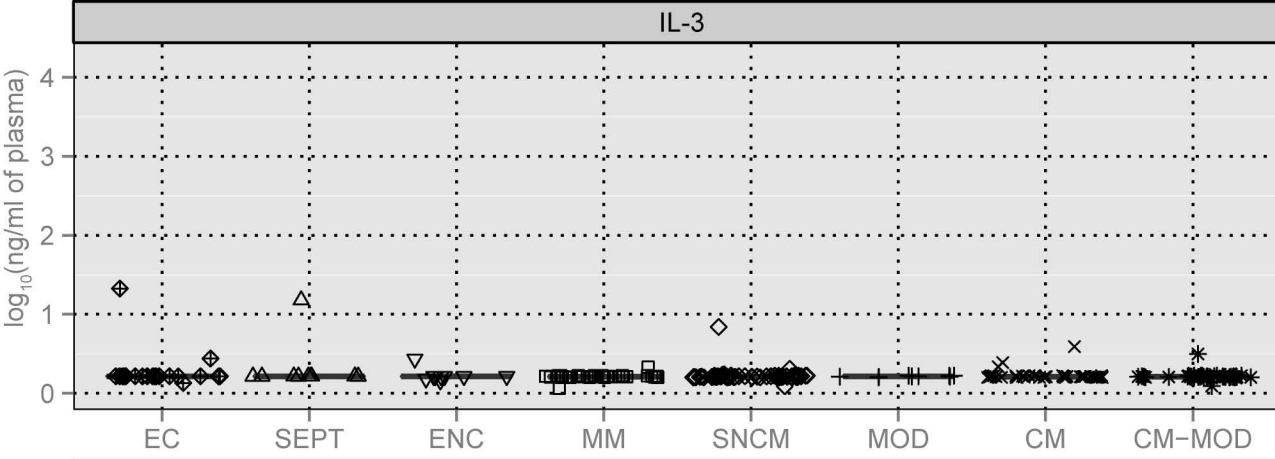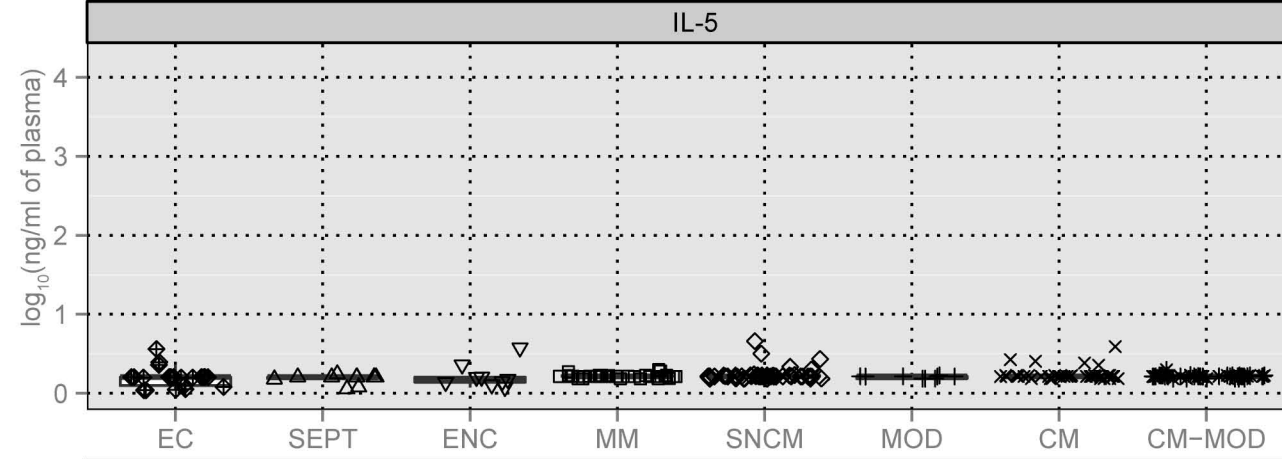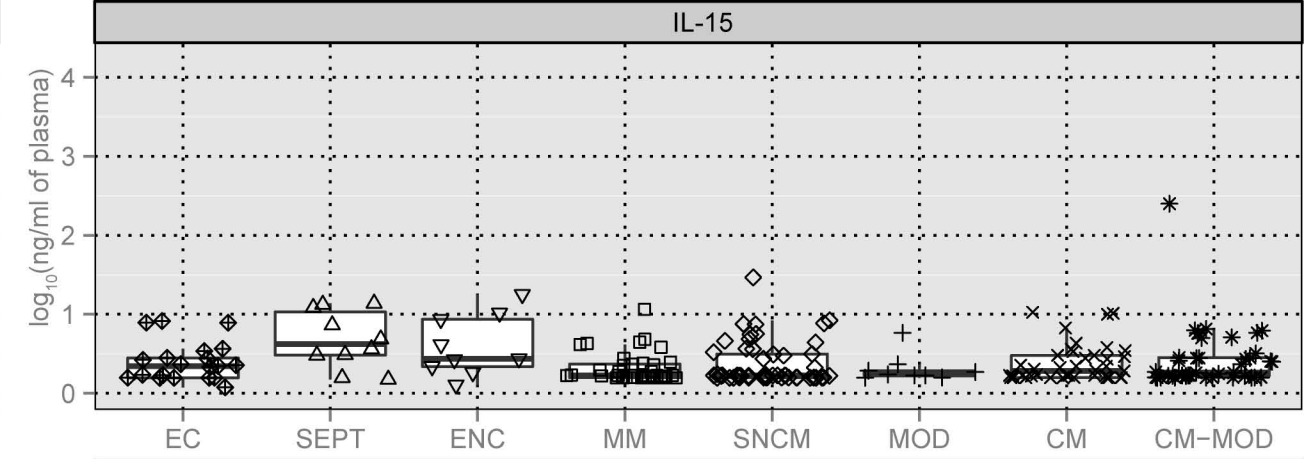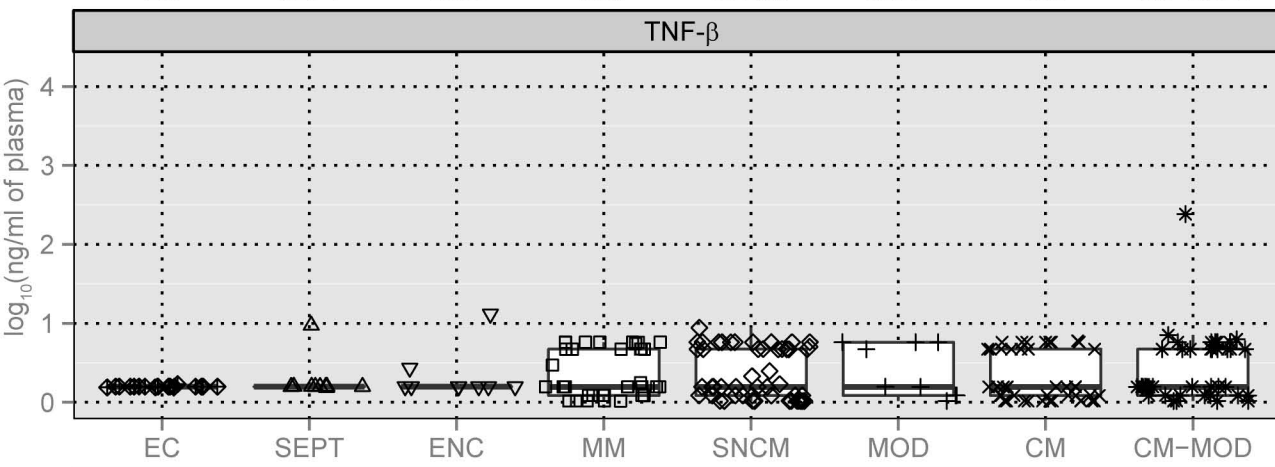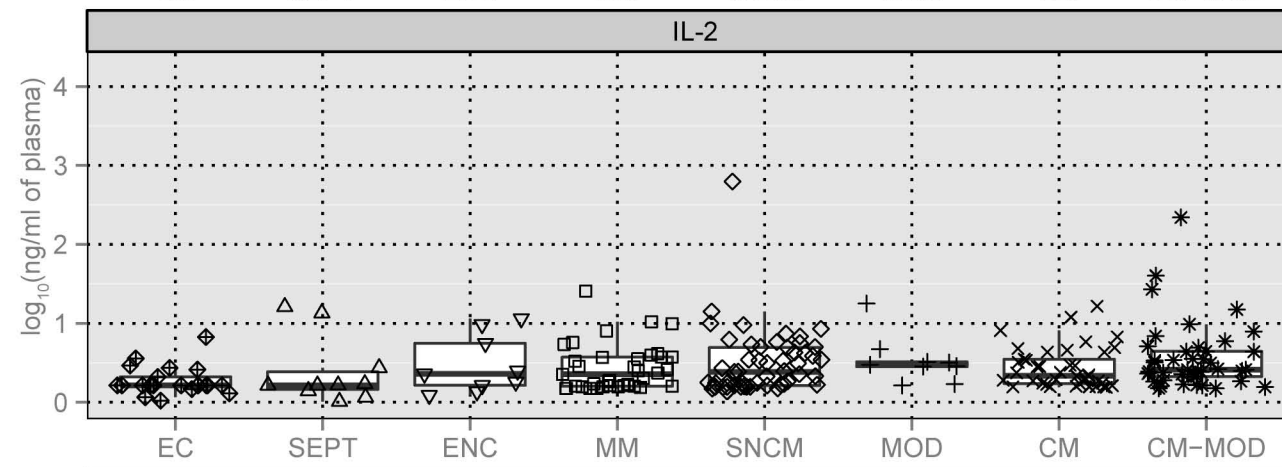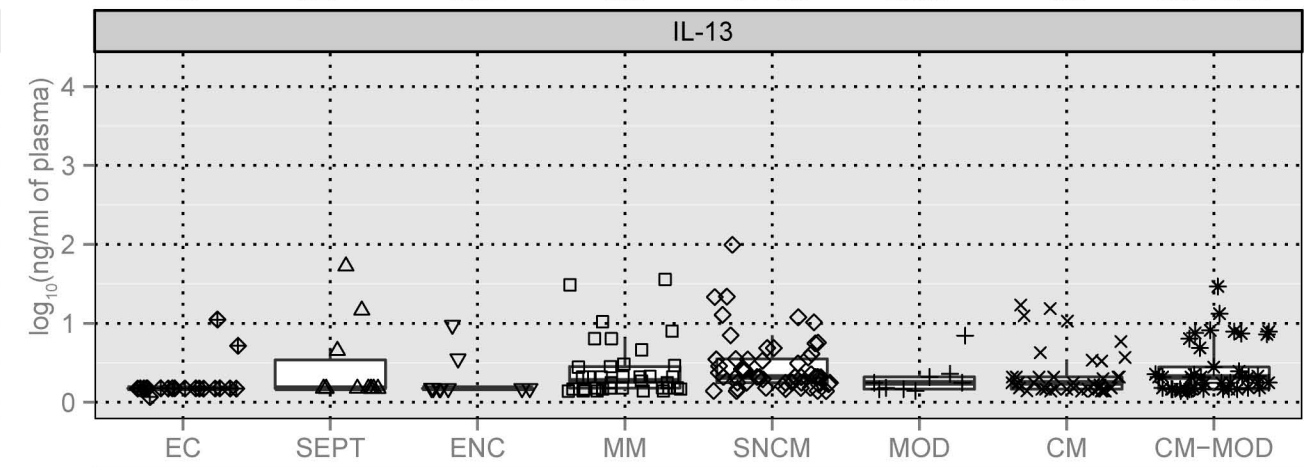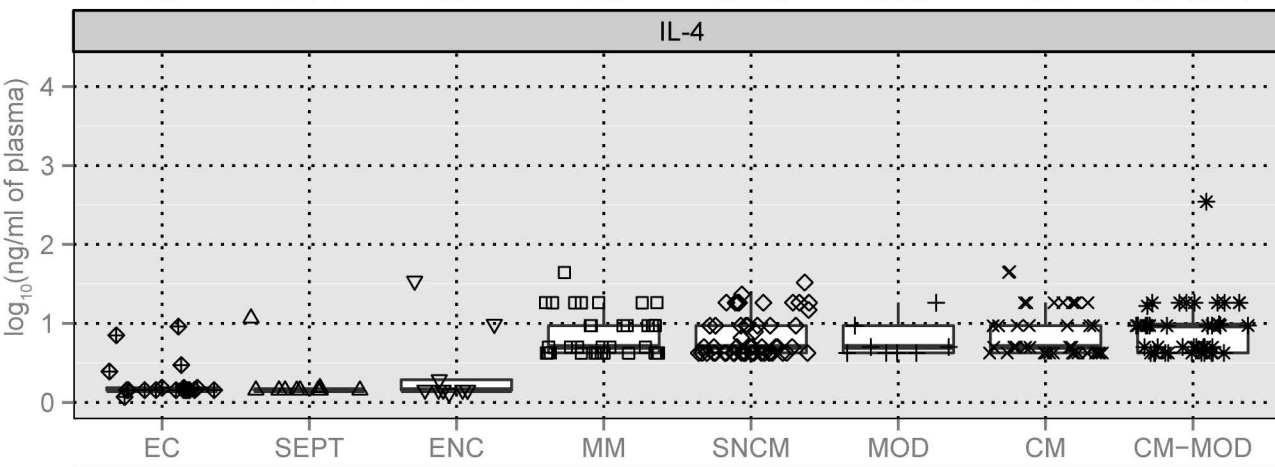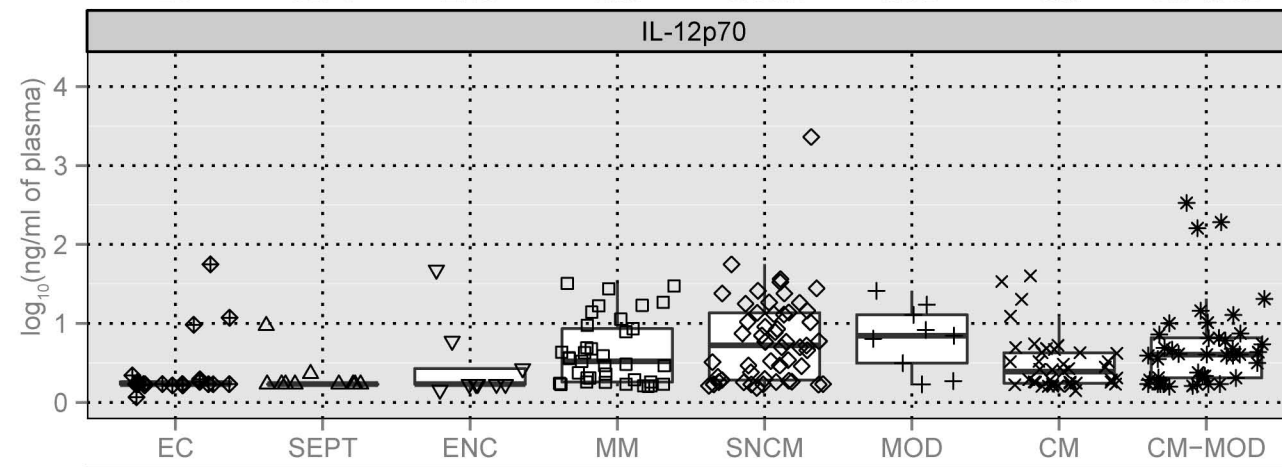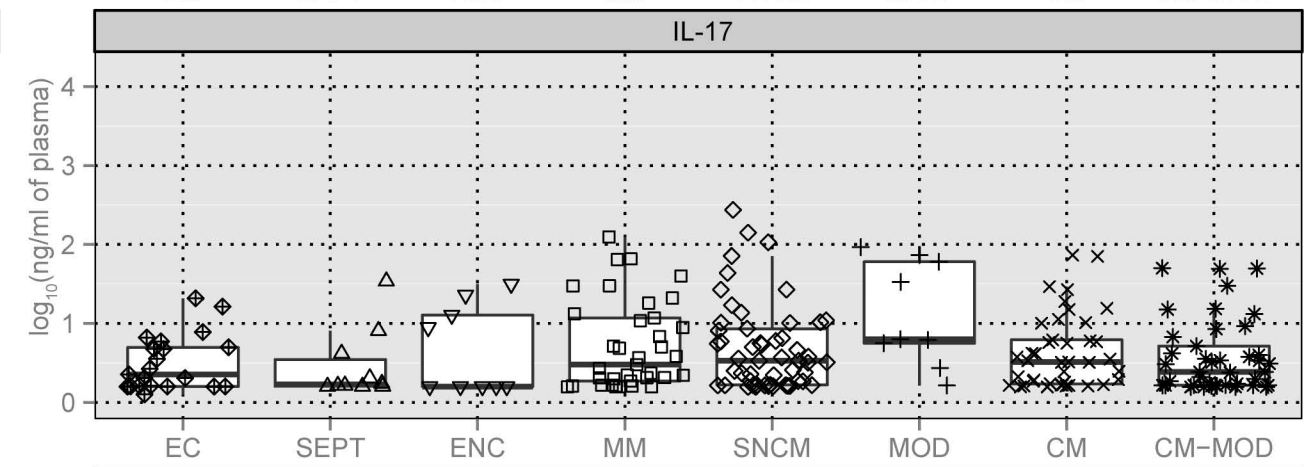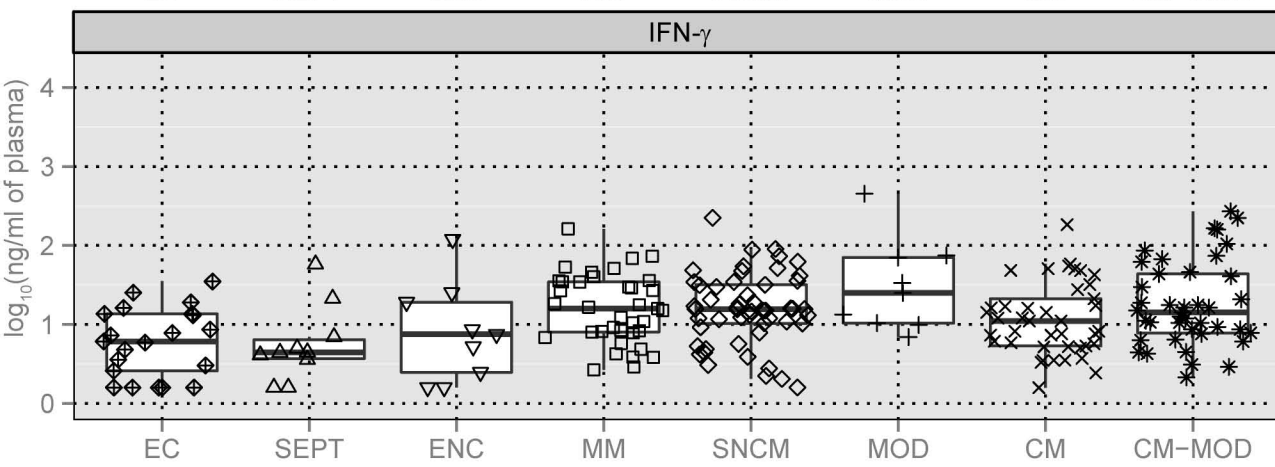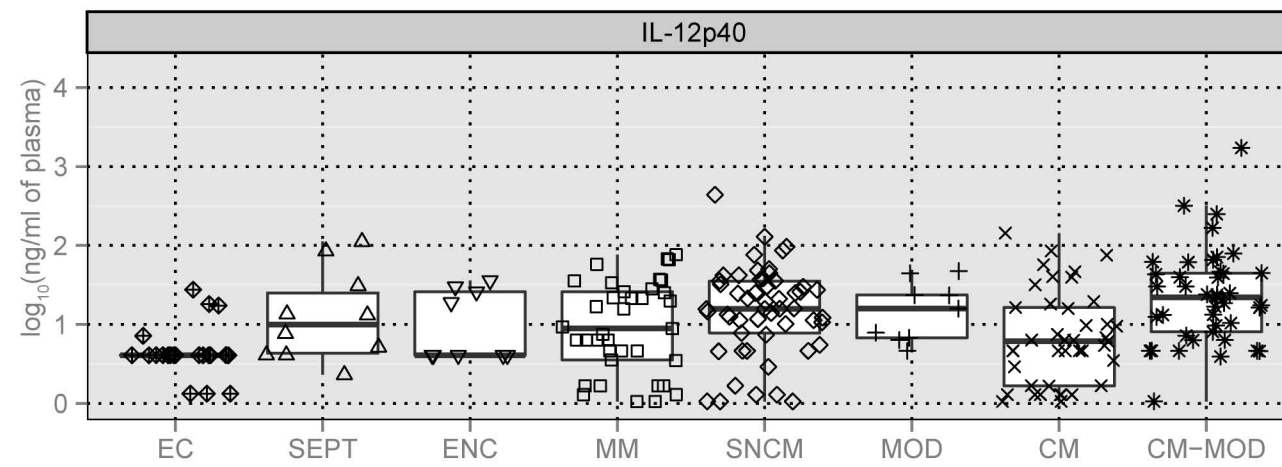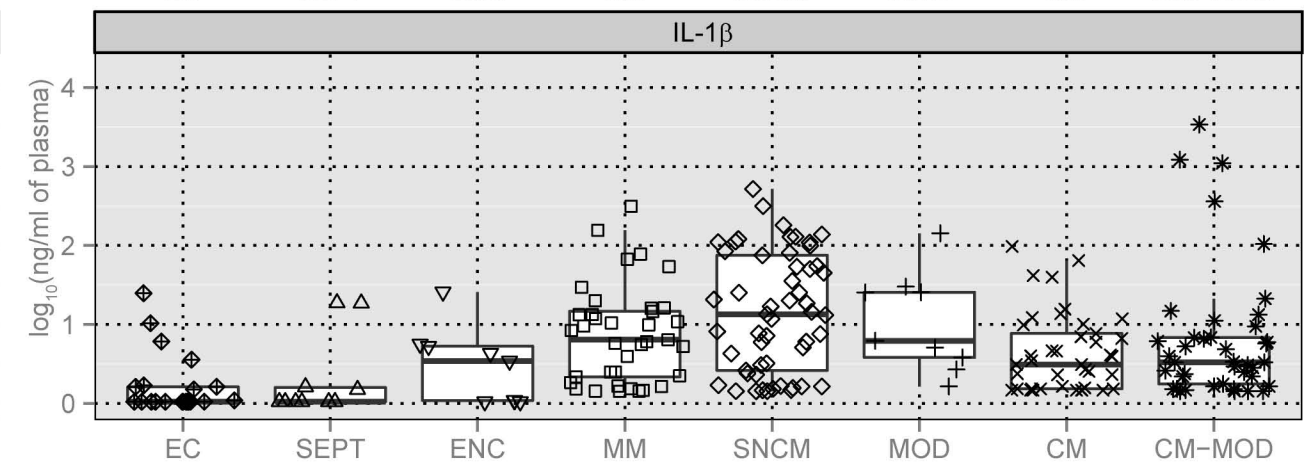

Supplement: 12967_2015_731_MOESM3_ESM.pdf [file 12967_2015_731_MOESM3_ESM.pdf]
